# Supplementary material
Source: publisher figshare collection journal article supplement (https://gsajournals.figshare.com/ndownloader/files/17706188)
Supplement: Supplementary file 1 [file 17706188]

Class	Total	Inferred Ancestral State	Proportion of Variants with Inferred Ancestral State
All	487366	283021	0.581
Noncoding	370820	188988	0.51
Synonymous	55055	47176	0.857
Nonsynonymous	57723	44258	0.767
Deleterious	3768	2599	0.51
